# Supplementary material for: Optimization of the Electrochemical Method of Obtaining Graphene Nanoplatelets (GNPs)
Source: MDPI journal article supplement (doi:10.3390/ma16062188), 2023-03-09
Supplement: s1 [file s1]

# Optimization of the Electrochemical Method of Obtaining Graphene Nanoplatelets (GNPs)

Adrianna Grabowska <sup>1,2</sup>, Jerzy Kowalczyk <sup>2</sup>, Robert Tomala <sup>2</sup>, Maciej Ptak <sup>2</sup>, Małgorzata Małecka <sup>2</sup>, Anna Wędyńska <sup>2</sup>, Mariusz Stefanski <sup>2</sup>, Wiesław Stręk <sup>2</sup> and Paweł Głuchowski <sup>2,\*</sup>

<sup>1</sup> Faculty of Chemistry, Wrocław University of Science and Technology, 50-370 Wrocław, Poland; adagrabowska10@gmail.com

<sup>2</sup> Institute of Low Temperature and Structure Research, Polish Academy of Sciences, 50-422 Wrocław, Poland; jerzy.kowalczyk@pwr.edu.pl (J.K.); r.tomala@intibs.pl (R.T.); m.ptak@intibs.pl (M.P.); m.malecka@intibs.pl (M.M.); a.wedzynska@intibs.pl (A.W.); m.stefanski@intibs.pl (M.S.); w.strek@intibs.pl (W.S.)

\* Correspondence: p.gluchowski@intibs.pl

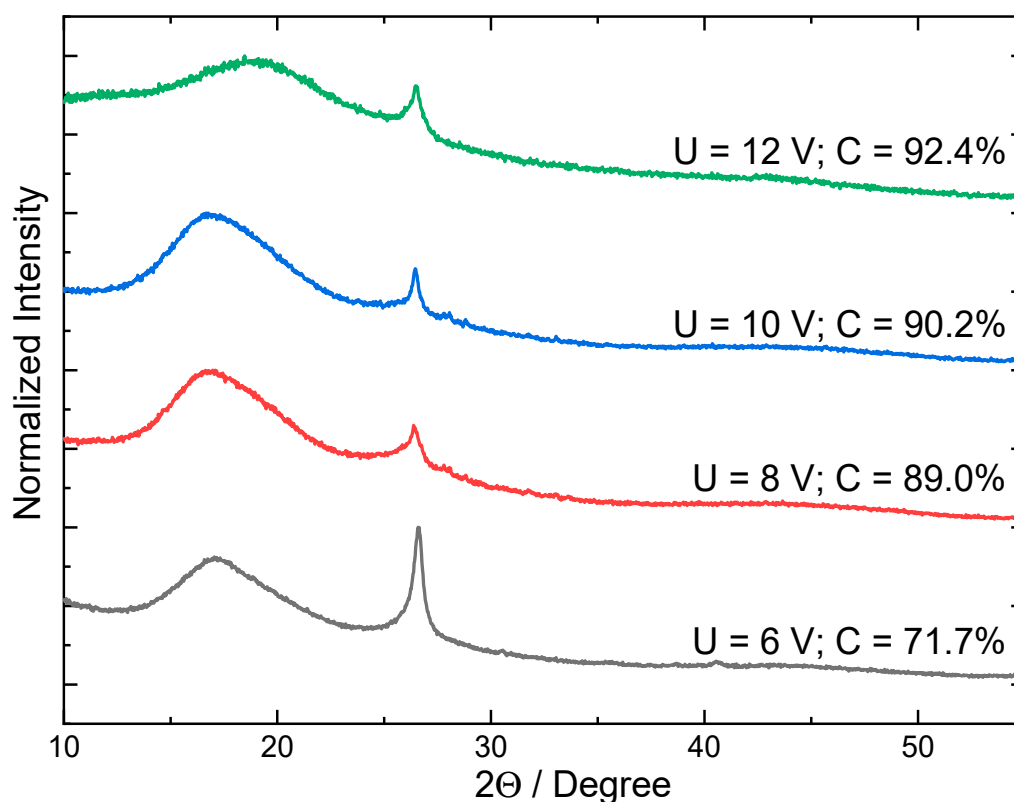

**Figure S1.** The influence of applied voltage in electrochemical process on the structure of obtained graphene samples.

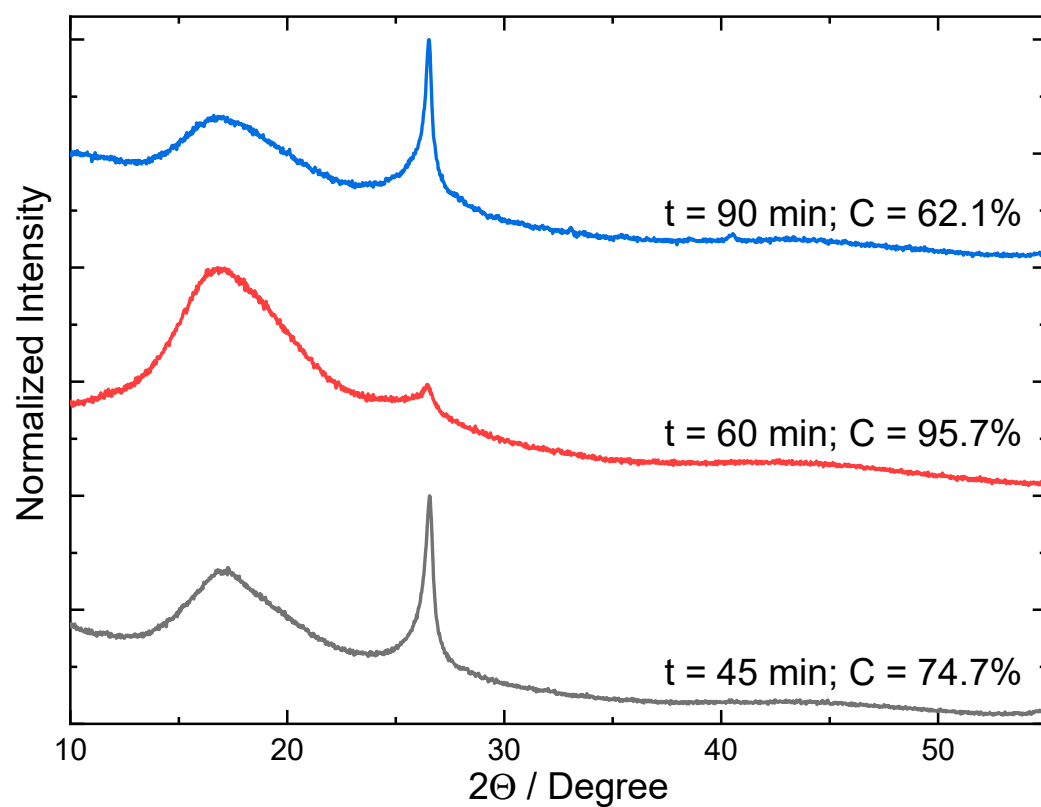

**Figure S2.** The influence of time of electrochemical process on the structure of graphene samples.

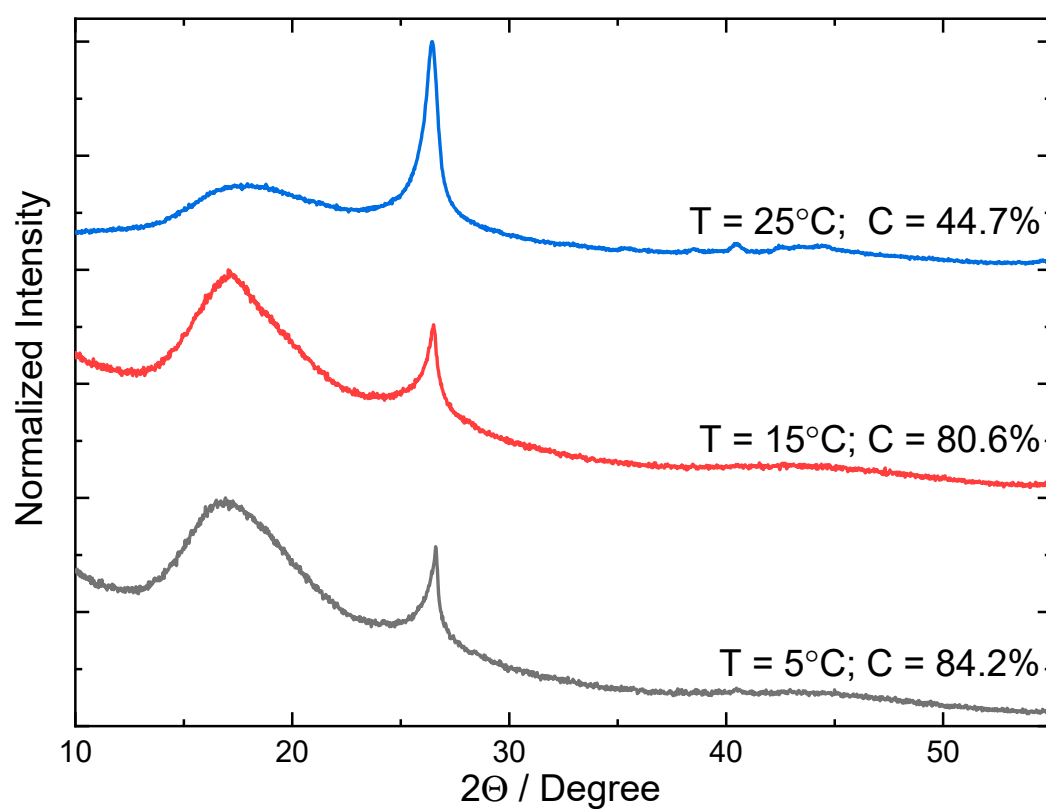

**Figure S3.** The influence of temperature of electrochemical process on the structure of obtained graphene samples.

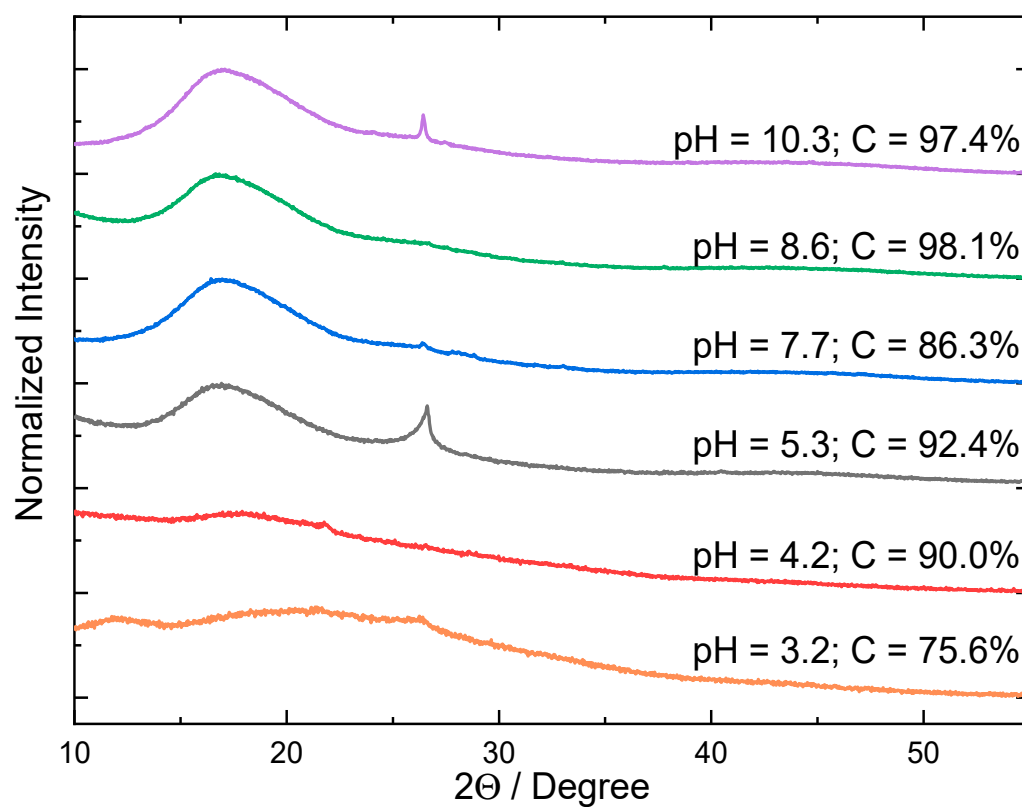

**Figure S4.** The influence of pH of solution in electrochemical process on the structure of obtained graphene samples.

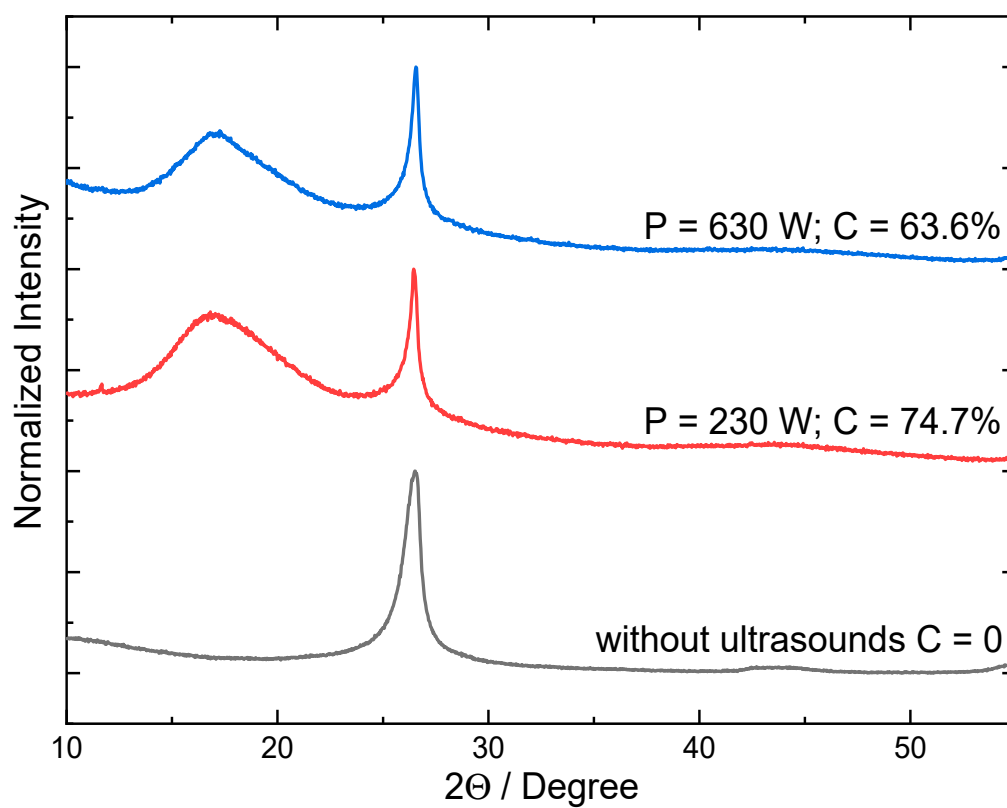

**Figure S5.** The influence of ultrasounds power on the structure of obtained graphene samples.

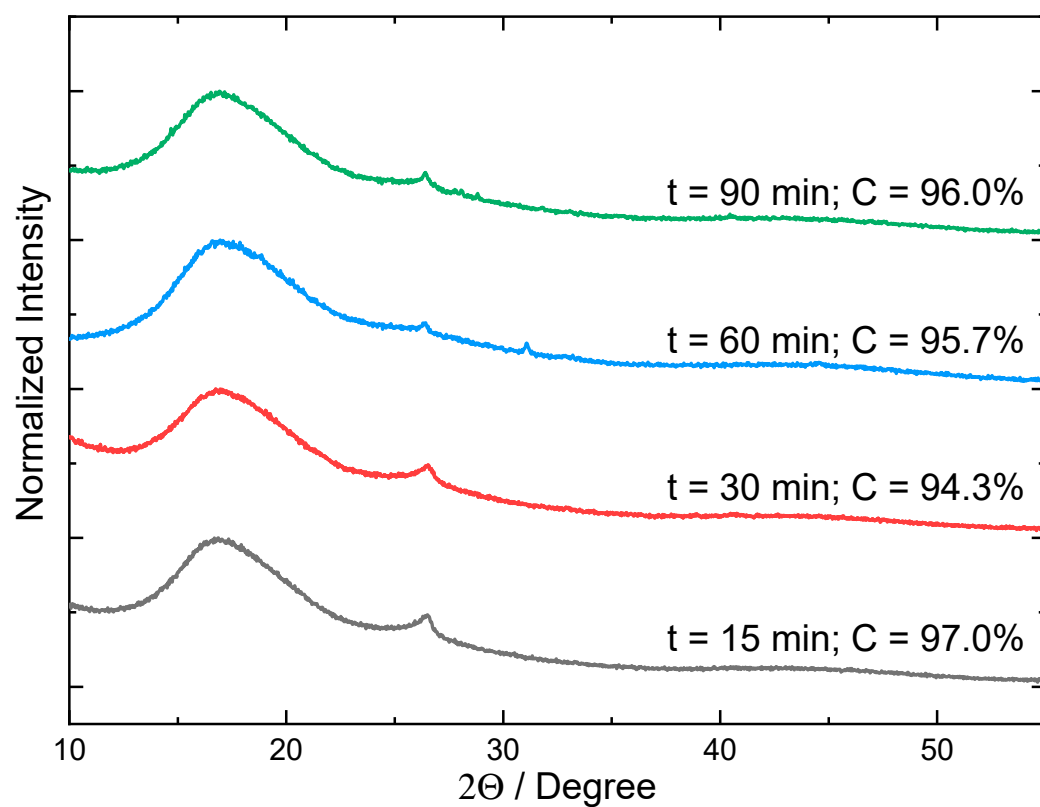

**Figure S6.** The influence of ultrasounds time on the structure of obtained graphene samples.

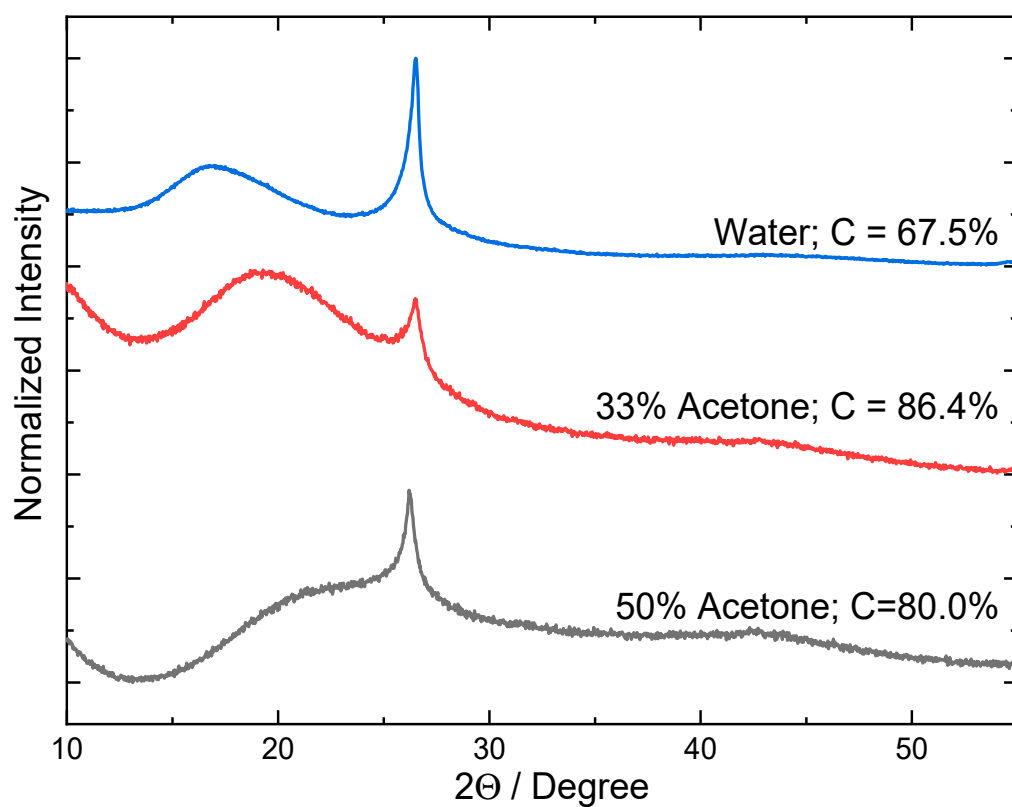

**Figure S7.** The influence of solution composition on the structure of obtained graphene samples.

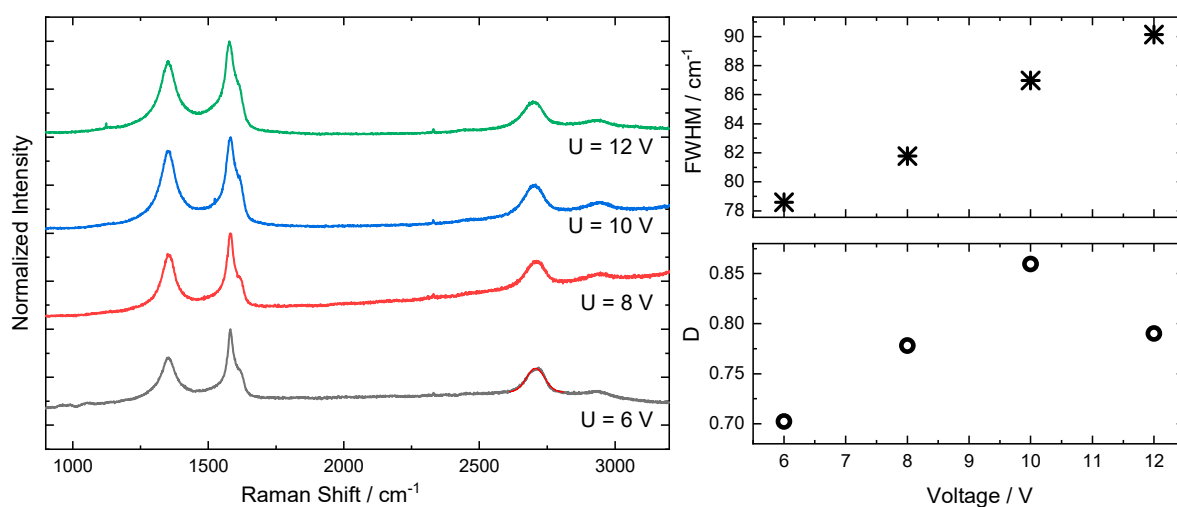

**Figure S8.** The influence of voltage applied in electrochemical process on Raman spectra, FWHM of 2D peak and degree of deformation (D) of obtained graphene samples.

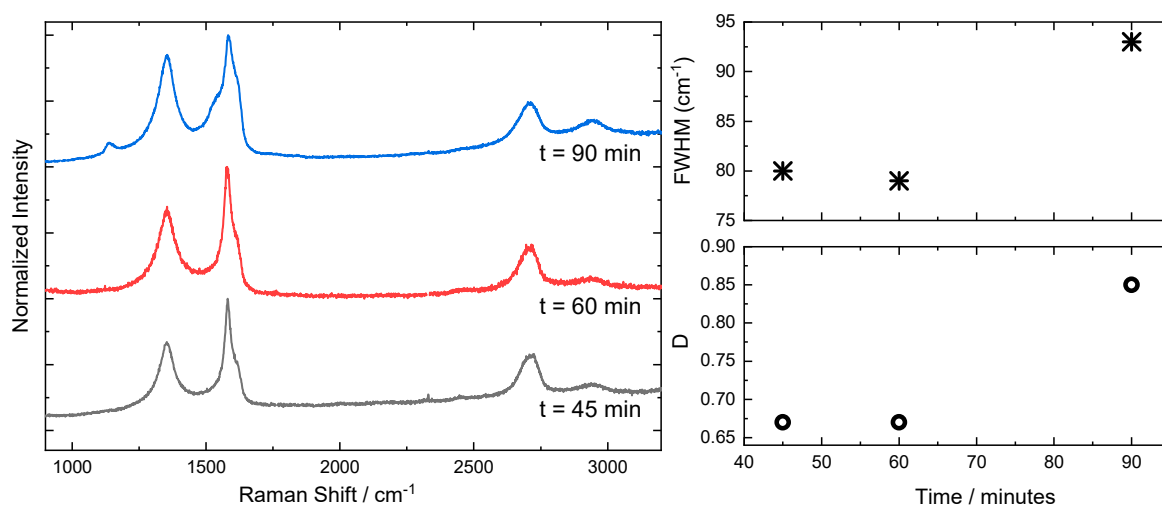

**Figure S9.** The influence of time of electrochemical process on Raman spectra, FWHM of 2D peak and degree of deformation (D) of obtained graphene samples.

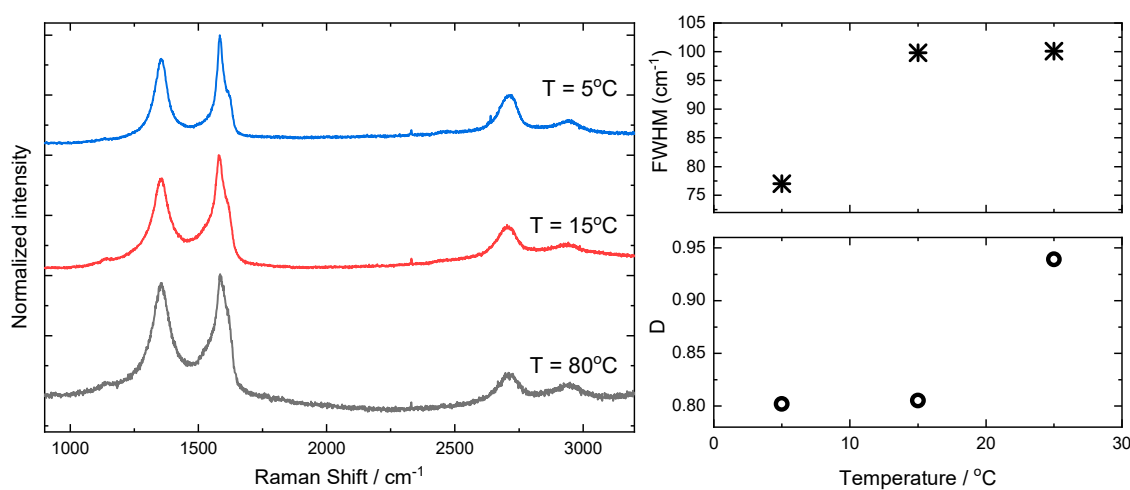

**Figure S10.** The influence of temperature of electrochemical process on Raman spectra, FWHM of 2D peak and degree of deformation (D) of obtained graphene samples.

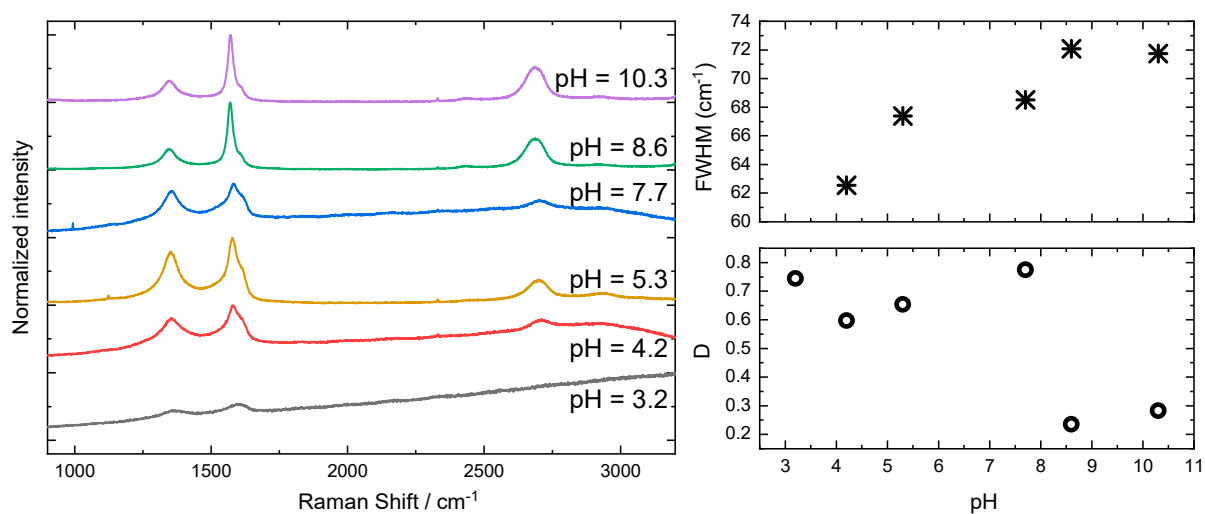

**Figure S11.** The influence of pH of solution in electrochemical process on Raman spectra, FWHM of 2D peak and degree of deformation (D) of obtained graphene samples.

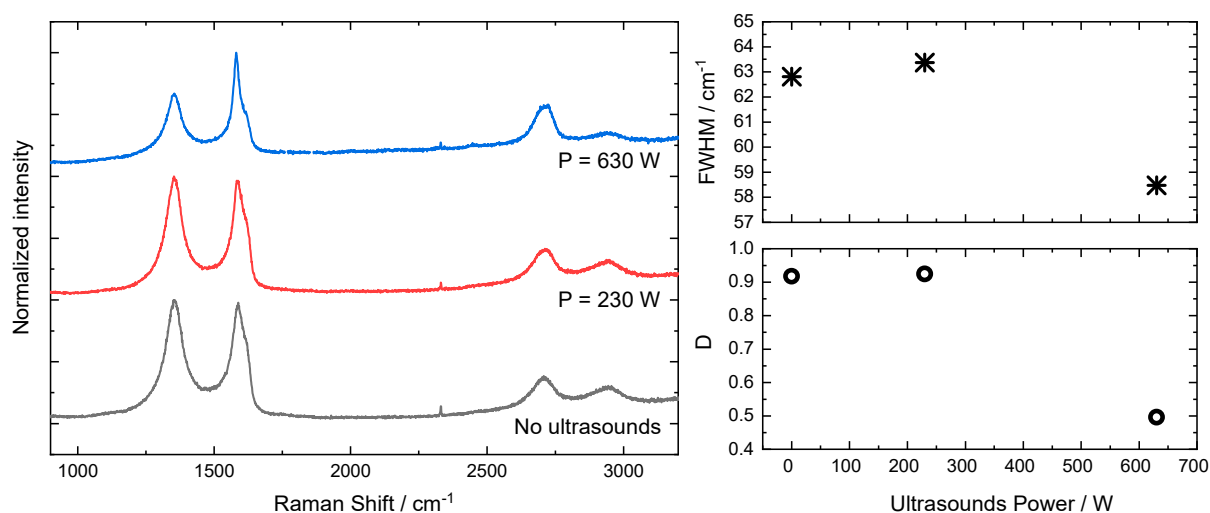

**Figure S12.** The influence of ultrasound power on Raman spectra, FWHM of 2D peak and degree of deformation (D) of obtained graphene samples.

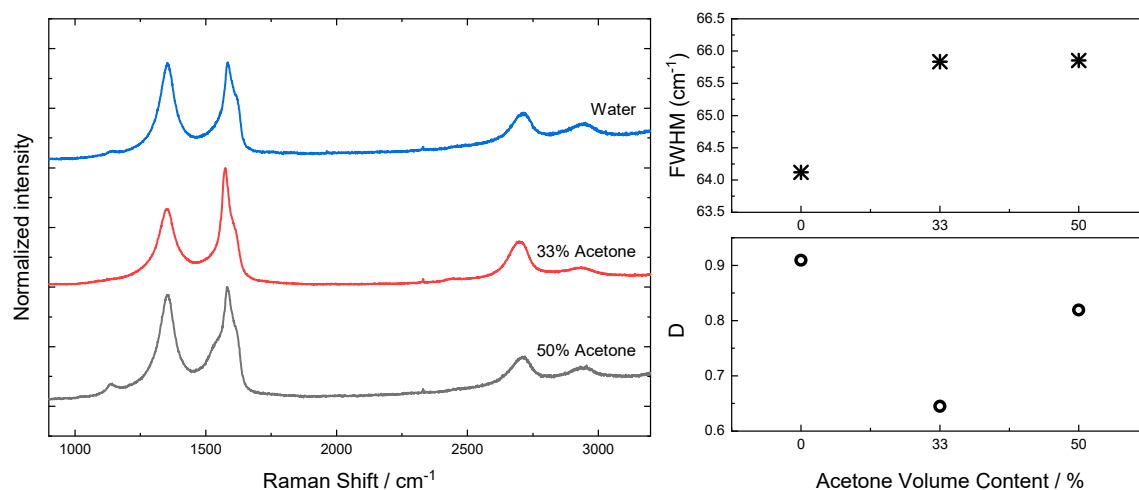

**Figure S13.** The influence of solution composition on Raman spectra, FWHM of 2D peak and degree of deformation (D) of obtained graphene samples.

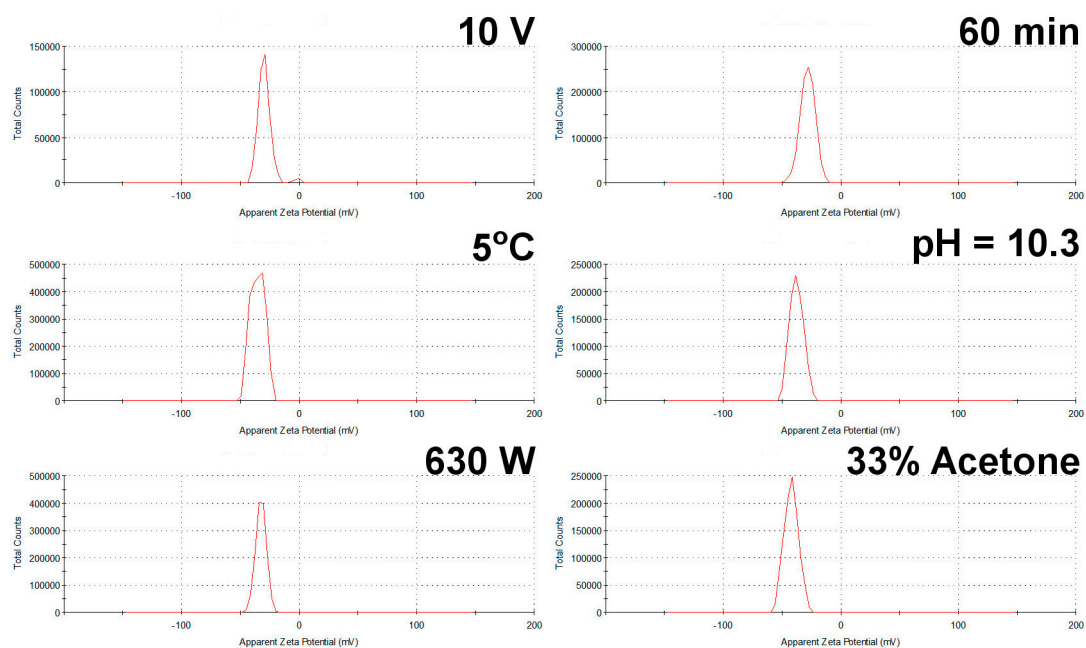

**Figure S14.** Zeta potential distribution of the graphene nanoplatelets obtained at different process conditions measured for suspension in water.
